# Supplementary material
Source: MDPI journal article supplement (https://www.mdpi.com/2311-7524/8/10/912)
Supplement: s1 [file s1]

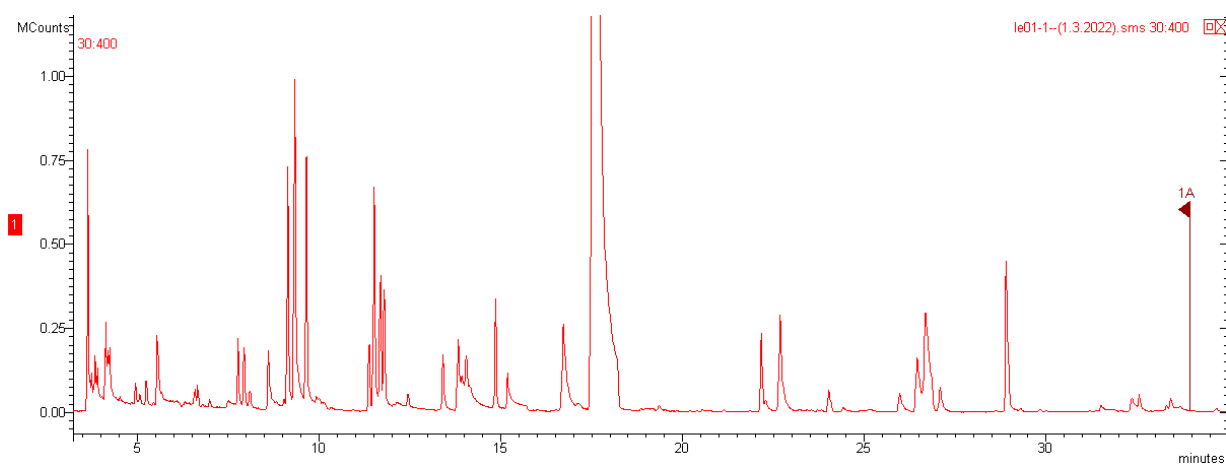

**Figure S1.** Sample of chromatogram of volatile aroma compounds found in monovarietal oil by headspace solid-phase microextraction combined with gas chromatography/ mass spectrometry (HS-SPME-GC-MS).

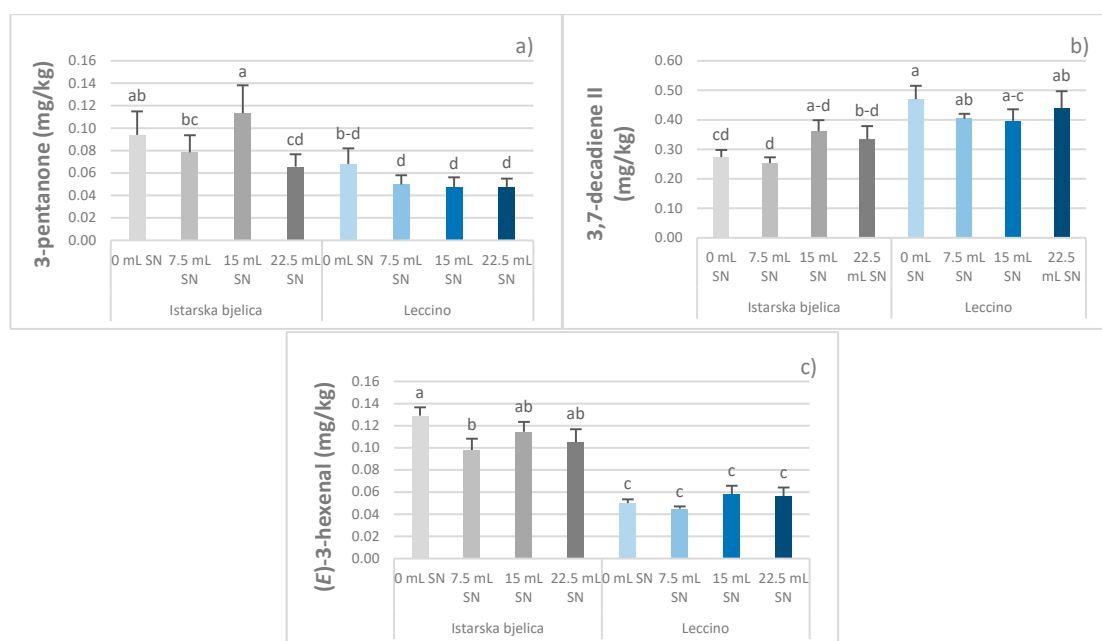

**Figure S2.** Multiple comparisons of the effects of treatment (T) (0, 7.5, 15, and 22.5 mL of applied SN foliar fertilizer per 1 L of water) and cultivar (Cv.) (Istarska bjelica, Leccino) on the concentration of (a) 3-pentanone, (b) 3,7-decadiene II, and (c) (E)-3-hexenal in olive oil. Different superscript lowercase letters represent statistically significant differences between mean values at  $p < 0.05$  obtained by a three-way ANOVA and Tukey's test.

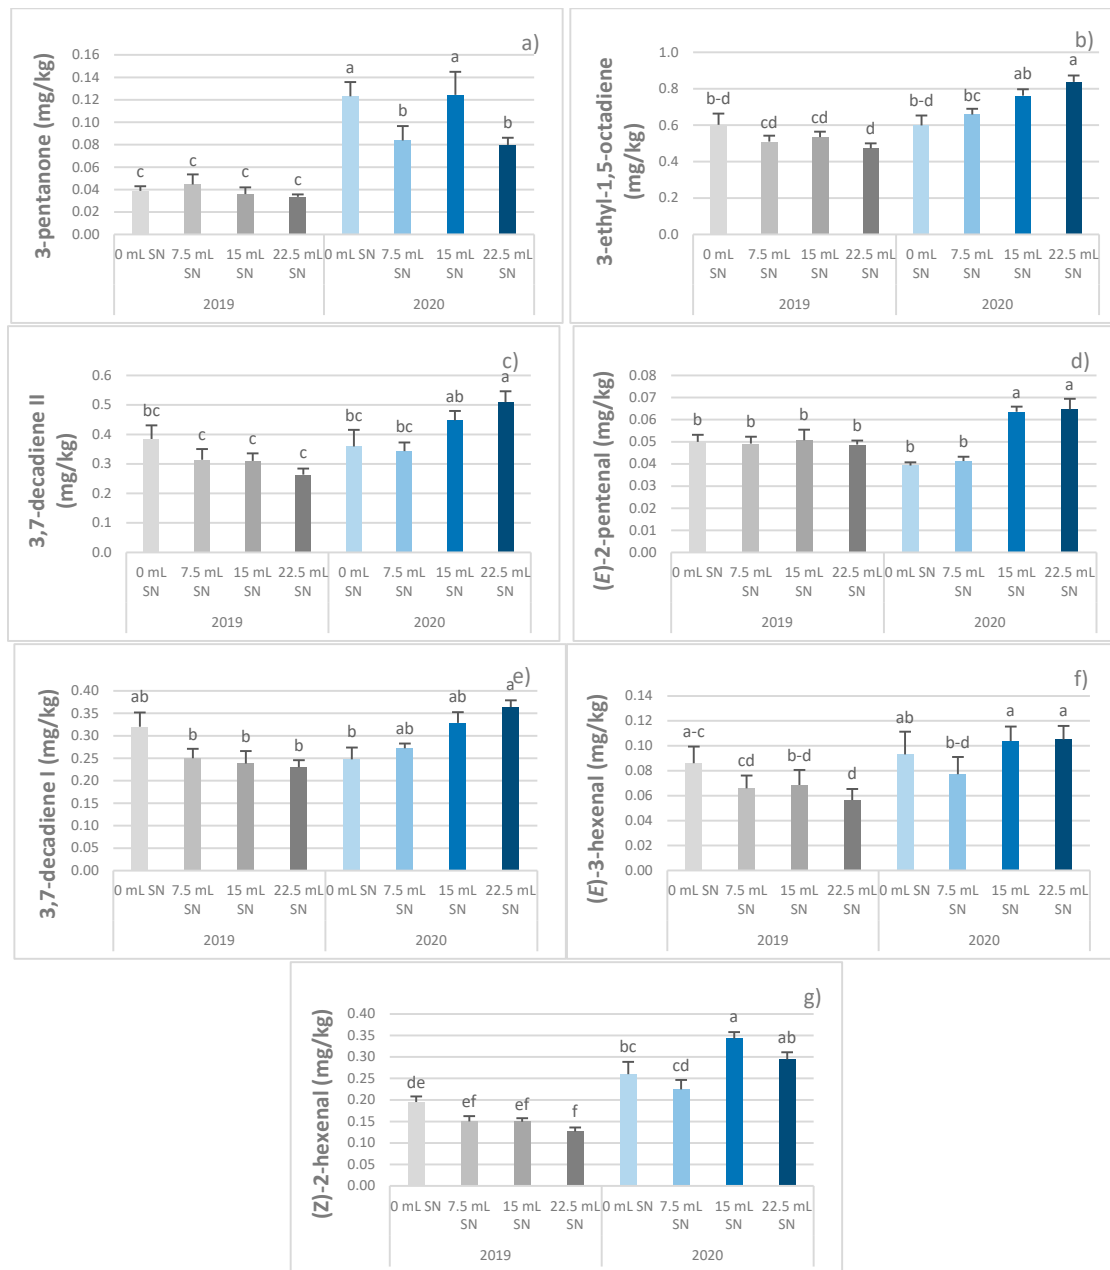

**Figure S3.** Multiple comparisons of the effects of treatment (T) (0, 7.5, 15, and 22.5 mL of applied SN foliar fertilizer per 1 L of water) and year (Y) (2019, 2020) on the concentration of (a) 3-pentanone, (b) 3-ethyl-1,5-octadiene, (c) 3,7-decadiene II, (d) (E)-2-pentenal, (e) 3,7-decadiene I, (f) (E)-3-hexenal, and (g) (Z)-2-hexenal in olive oil. Different superscript lowercase letters represent statistically significant differences between mean values at  $p < 0.05$  obtained by a three-way ANOVA and Tukey's test.

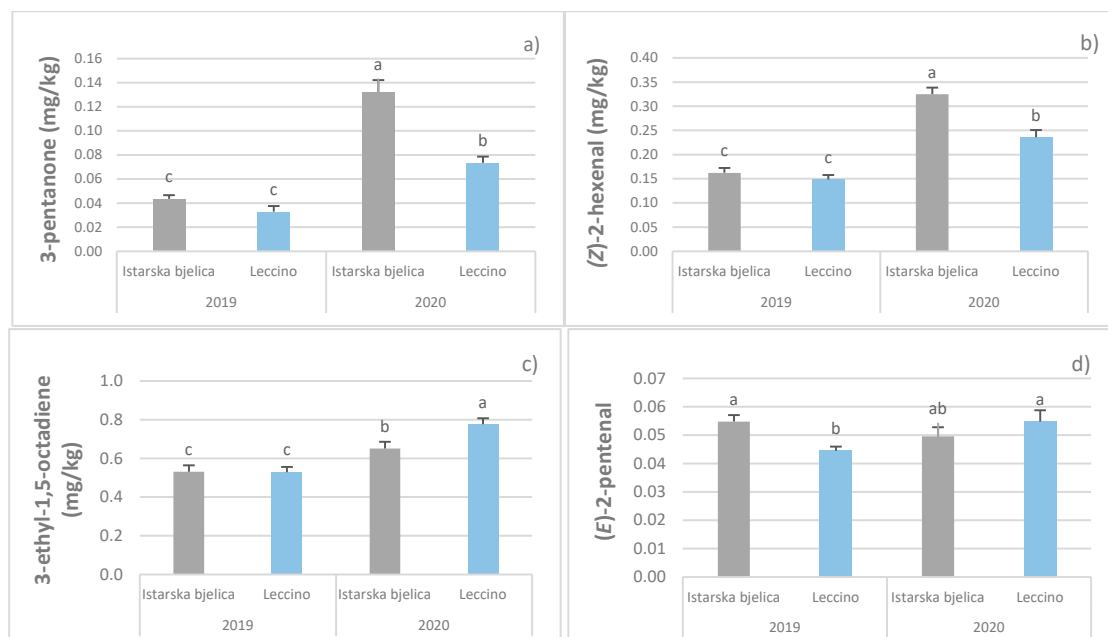

**Figure S4.** Multiple comparisons of the effects of cultivar (Cv.) (Istarska bjelica, Leccino) and year (Y) (2019, 2020) on the concentration of (a) 3-pentanone, (b) (Z)-2-hexenal, (c) 3-ethyl-1,5-octadiene, (d) (E)-2-pentenal in olive oil. Different superscript lowercase letters represent statistically significant differences between mean values at  $p < 0.05$  obtained by a three-way ANOVA and Tukey's test.

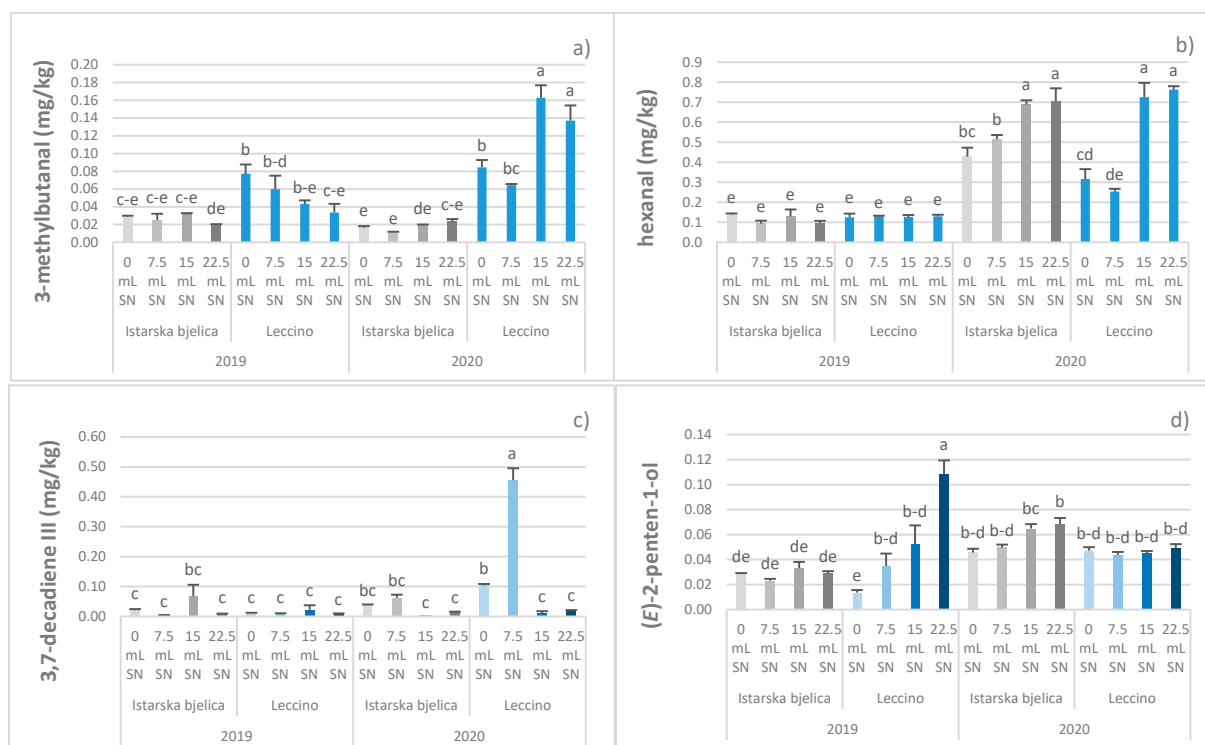

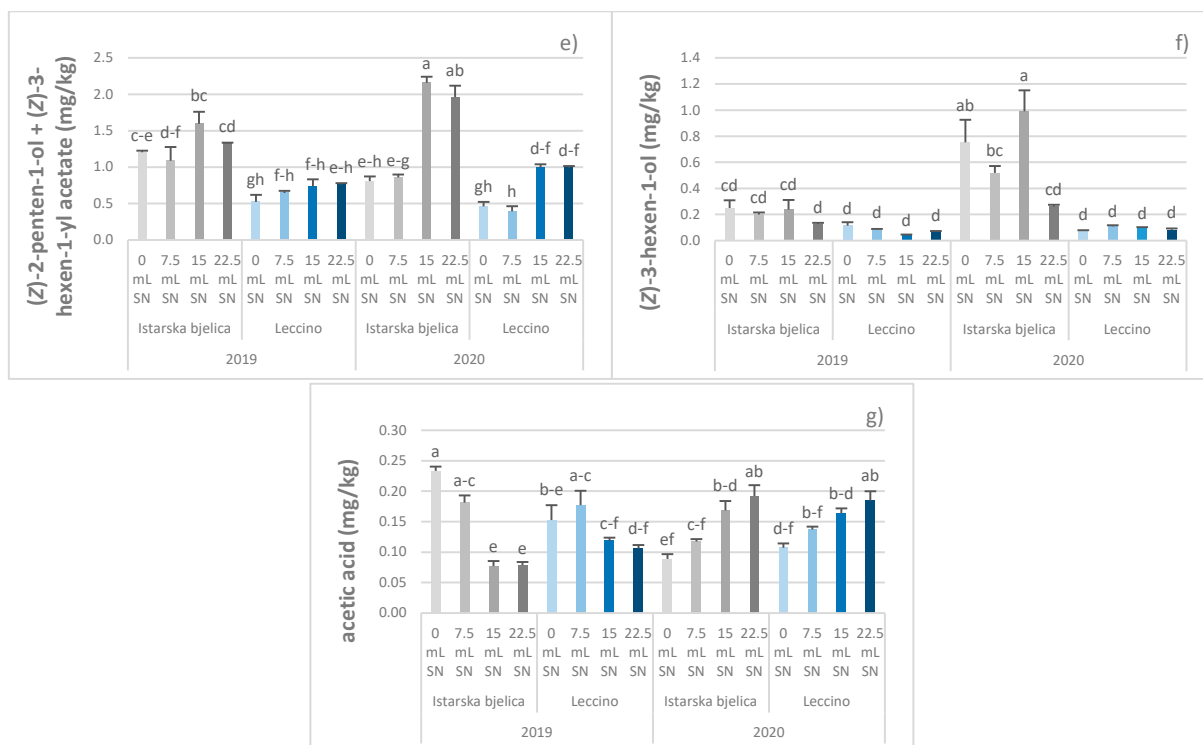

**Figure S5.** Multiple comparisons of the effects of treatment (T) (0, 7.5, 15, and 22.5 mL of applied SN foliar fertilizer per 1 L of water), cultivar (Cv.) (Istarska bjelica, Leccino) and year (Y) (2019, 2020) on the concentration of (a) 3-methylbutanal, (b) hexanal, (c) 3,7-decadiene III, (d) (E)-2-pentenol (e) (Z)-2-penten-1-ol + (Z)-3-hexen-1-yl acetate (f) (Z)-3-hexen-1-ol, (g) acetic acid in olive oil. Different superscript lowercase letters represent statistically significant differences between mean values at  $p < 0.05$  obtained by a three-way ANOVA and Tukey's test.

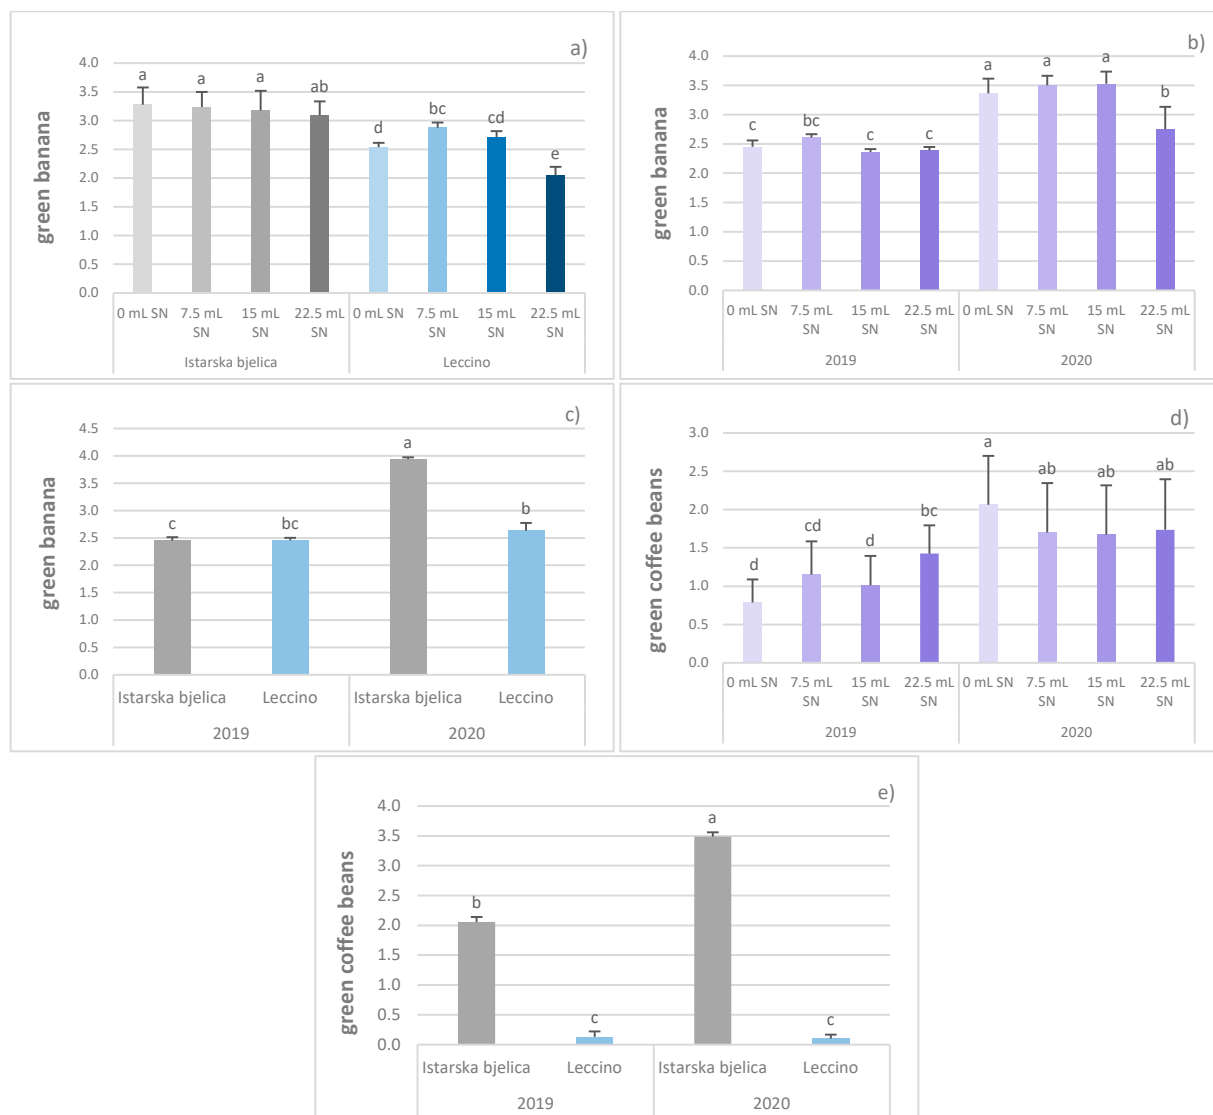

**Figure S6.** Multiple comparisons of the effects of treatment (T) (0, 7.5, 15, and 22.5 mL of applied SN foliar fertilizer per 1 L of water) and cultivar (Cv.) (Istarska bjelica, Leccino) (a) on the intensity of banana flavor; treatment and year (Y) (2019, 2020) (b) on the intensity of banana flavor; cultivar and year (c) on the intensity of banana flavor; treatment and year (d) on the intensity of coffee flavor; cultivar and year (e) on the intensity of coffee flavor of olive oil. Different superscript lowercase letters represent statistically significant differences between the mean values at  $p < 0.05$  that were obtained by a three-way ANOVA and Tukey's test.

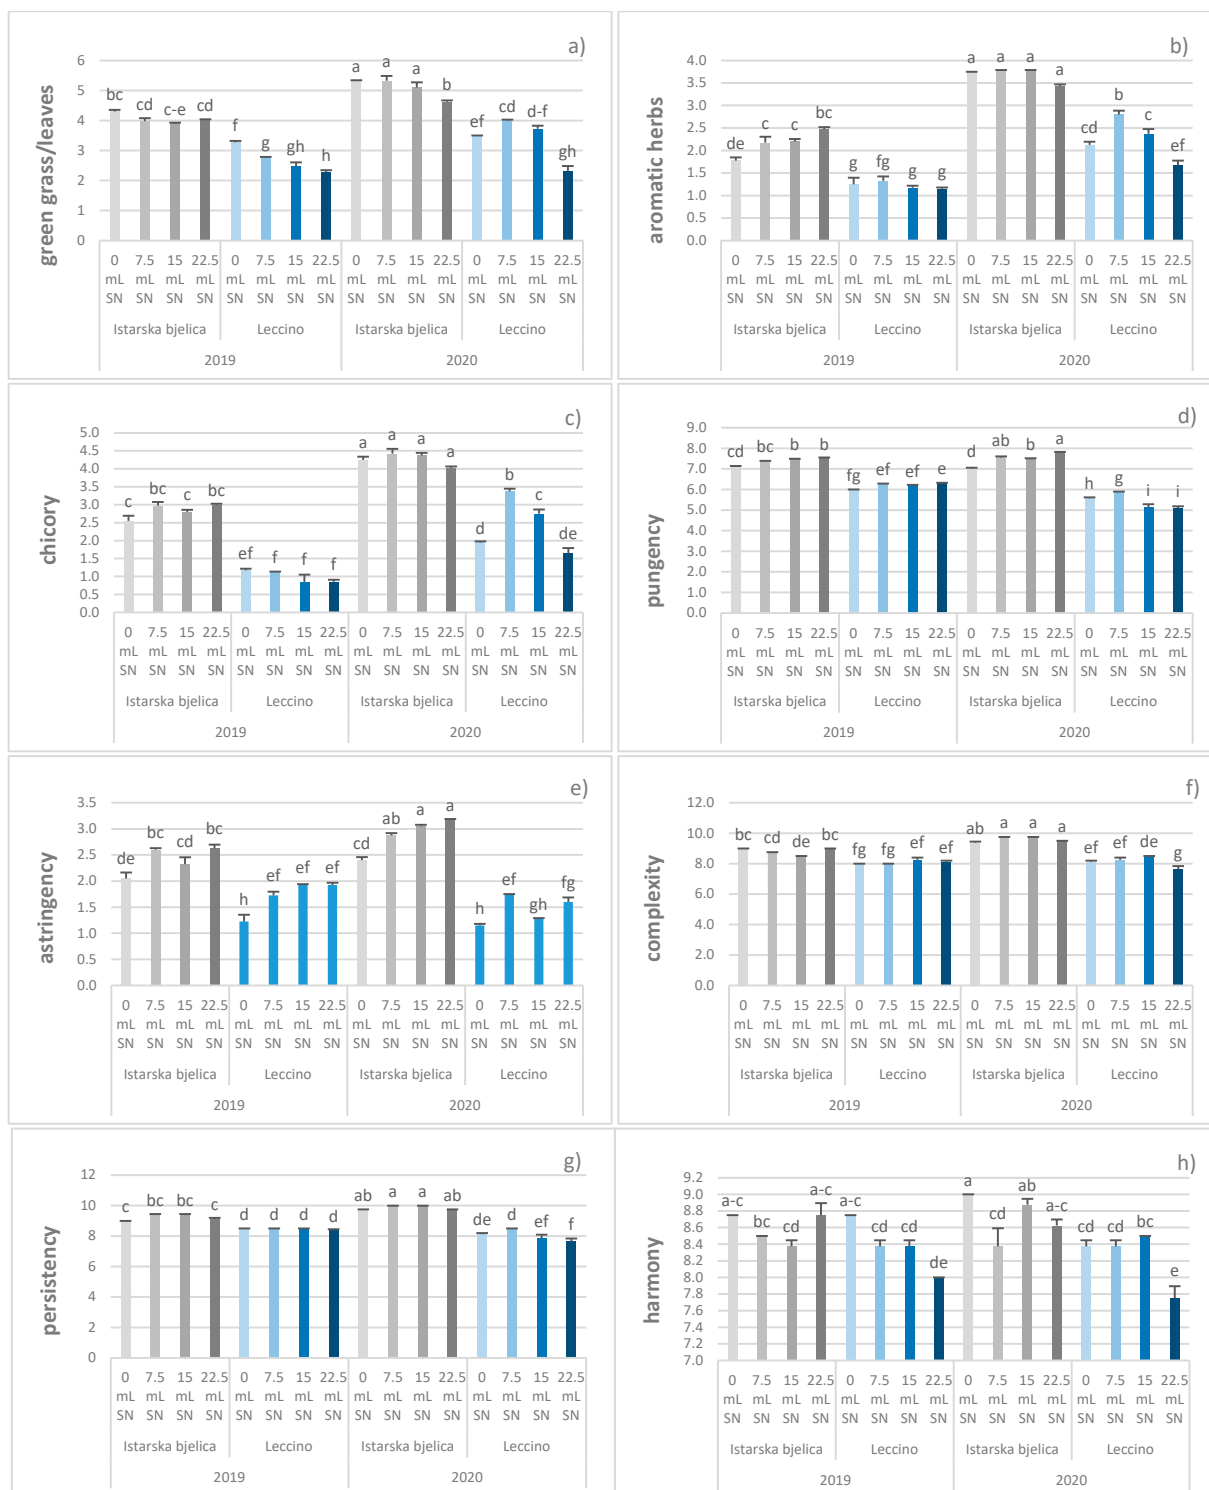

**Figure S7.** Multiple comparisons of the effects of treatment (T) (0, 7.5, 15, and 22.5 mL of applied SN foliar fertilizer per 1 L of water), cultivar (Cv.) (Istarska bjelica, Leccino) and year (Y) (2019, 2020) on the intensity of (a) grass, (b) herbs, and (c) chicory flavors and on the intensity of (d) pungency, (e) astringency, (f) complexity, (g) persistency, and (h) harmony attributes of olive oil. Different superscript lowercase letters represent statistically significant differences between mean values at  $p < 0.05$  obtained by a three-way ANOVA and Tukey's test.
